# Supplementary material
Source: ML conference proceedings conference paper supplement (https://openreview.net/forum?id=9Wmdk94oKF)
Supplement: supplementary_material [file attachment]

Below are some questions and answers related to grading when teachers are marking papers:

Q: As a teacher, how should I go about grading papers?

A: Open the official CPHOS mini-program, click on "Home" -> "Marking Center", please make sure the "Current Exam" and "Marking Question Number" are correct. Before you have finished marking, please score the questions allocated in the mini-program according to the scoring criteria. Scoring criteria: If the sub-question is an answer question, the calculation result is correct, and the problem-solving process is error-free, give full marks. If it is inconsistent with the answer method, please report to the organizing committee for arbitration; if the result is incorrect, if the scoring standard only has one method, judge whether each process is valid according to the scoring equation given by the scoring standard, and give points to the valid equations reflected in the answer. If the scoring standard has multiple methods, choose the method that scores the most for the answerer. If the sub-question is a proof question, it is required to judge whether each process is valid according to the scoring equation given by the scoring standard, and give points to the valid equations reflected in the answer. If the scoring standard has multiple methods, choose the method that scores the most for the answerer; if a method not included in the scoring standard is used, and the reasoning is sound, please also report to the organizing committee. For each question, fill in the corrected score in the "Score" column, then click "Next" to transmit the results to the server and get the next question. If you believe there is a misjudgment during the marking process, you can click "Back" to return to the misjudged question, modify the score in the "Score" column, and click "Next" to transmit the results to the server. When the "Unmarked" column is "0" or "-", it means that the marking task assigned to your group of users has been completed.

Q: Why do I have so many papers to grade?

A: The distribution of papers is fairly allocated according to specific rules. If you feel that the volume of grading is abnormal, please consult the customer service and contact the CPHOS technical group in time.

Q: Can I let students help me grade papers?

A: In principle, the grading work should be completed by one team leader. If you feel that the volume of grading is too large, you can apply to the technical group, and we will open the grading permissions for the deputy team leader. To ensure fairness and the quality of grading, we do not recommend letting students grade papers. If discovered, CPHOS may issue warnings, impose bans, etc.

Q: Why do I have grading tasks even though I didn't upload any papers?

A: This is because the team leader or other deputy team leaders in your team have uploaded papers. You all share these grading tasks.
