# Supplementary material
Source: ML conference proceedings conference paper supplement (https://openreview.net/forum?id=9Wmdk94oKF)
Supplement: supplementary_material [file attachment]

Here are some questions that may arise during the exam, along with their answers:

Q: Why can't I unzip the exam paper?

A: If you can't unzip the exam paper, you can download a software called 7zip to open the compressed exam file. The passwords for the theoretical and experimental exam PDFs can be found in the txt file.

Q: Can I upload the exam paper after the time limit has passed?

A: Once the time limit has passed, you can no longer upload the exam paper. Please complete the upload within the specified time. If there are special circumstances, please consult customer service and contact the CPHOS technical team promptly.

Q: How do I upload the exam paper?

A: Open the official CPHOS app and follow these steps: 1 Click on "Home" 2 Click on "Answer Sheet Upload" and select the candidate's name 3 Click on "Upload Answer Sheet" under the "Question 1" heading, then choose "Take Photo" or "Choose from Album". You can choose "Take Photo" and use your phone's camera to capture the corresponding question, or choose "Choose from Album" and select the appropriate photo from your album 4 After you've selected a photo for a question, the app will automatically present the submission options for the next question ("Take Photo," "Choose from Album," "Cancel"). If you want to continue selecting photos for the next question, you can click directly. You can also click "Cancel" and then click "Upload Answer Sheet" for the corresponding question. This continuous selection function is designed to improve upload efficiency 5 If you want to reselect a photo for a question, click the cross in the upper right corner of the photo to delete it, then reselect 6 Repeat steps 3 to 5 until photos for every question for the student have been chosen or taken. Then, click "Submit" at the bottom of the page. If it displays "Submission Successful", then all the student's answers have been successfully submitted. Before submitting, please make sure to carefully check that all answer sheets have been correctly uploaded 7 Repeat steps 2 to 6 until all the answers for every student have been successfully submitted.

Q: What if I uploaded the wrong exam paper, how do I re-upload?

A: You need to delete that student in the app, then re-add the student's information, and upload the exam paper again. If you have any questions, please contact the CPHOS technical team.

Q: We missed the deadline for handing in the paper, can you open the channel again?

A: If you missed the deadline for handing in the paper, you need customer service. Please contact the CPHOS technical team promptly for communication. After negotiation, we will open the channel for you.

Q: Can you distribute the exam papers in advance?

A: The submission time is generally quite ample, and you can adjust the exam time accordingly. If there are special circumstances and you need to distribute the papers in advance, please contact the CPHOS management promptly.
