# Supplementary material
Source: ML conference proceedings conference paper supplement (https://openreview.net/forum?id=9Wmdk94oKF)
Supplement: supplementary_material [file attachment]

Here are some questions about identity entry, along with their answers:

Q: Why hasn't the teacher's review been approved?

A: If the teacher's status is "Pending Review", please wait for the review; if the teacher's status is "Not in the System", it means that you did not log in as required when registering, and the first login is definitely not approved.

Q: How to add a deputy leader?

A: You need to contact the external liaison, and provide the deputy leader's WeChat nickname, school, and name. The deputy leader teacher must, like you, log in to the mini-program for authorization and wait for our backend review. After the review is complete, the teacher's WeChat can be used to log into the mini-program.

Q: How do I add student information?

A: For how to add student information, the mini-program user guide records detailed student addition methods, which you can refer to: 3 Enter student information 3-1 Click "My" -> "Candidate Information" 3-2 Click "Add Candidate Information", then enter the name in turn, choose the grade, choose historical awards, and then click "Confirm" 3-3 Repeat the operation in 3-2 until all student information is entered 3-4 If you need to modify or delete some student information, please click "Edit" on the right side of the candidate information to modify, or "Delete" to delete.

Q: Why is the student information displayed incorrectly?

A: If you find that the student information is displayed incorrectly, you can open the official CPHOS mini-program, click "My" -> "Candidate Information" -> "Edit" to change the student information.
