# Supplementary material
Source: ML conference proceedings conference paper supplement (https://openreview.net/forum?id=9Wmdk94oKF)
Supplement: supplementary_material [file attachment]

Here are some questions students may have when checking their scores, along with their answers:

Q: How do I check my scores?

A: Click on "Total Score and Ranking", where you can view the theoretical, experimental, and total scores of each student. Click on "Score Details for Each Question"; by sliding the table left or right, you can view the scores of different questions. Whether before or after checking scores, you can view the current score of each question for each student here. In the upper right corner of the "Total Score and Ranking" page, there is an "Export" button. Clicking on it will export the scores, rankings, and question-by-question scores of each student into an Excel spreadsheet. In the spreadsheet page, click on the ellipsis in the upper right corner to send the spreadsheet out or keep it for other uses. Currently, this function is not supported on the desktop version of the app, and it is recommended to use a mobile phone for export.

Q: How do I check my scores?

A: Please communicate with the current team leader in your competition area and submit a score checking form. Currently, it is not supported to submit a score checking form within the app.

Q: Why can't I see the student's scores?

A: There may be a delay in the system, you can try refreshing or wait a bit. If there are special circumstances, please consult customer service and contact the CPHOS technical team promptly.

Q: Why can't I see the student's ranking?

A: In the app, you should be able to see your student's regional ranking and overall ranking. CPHOS does not publicly release a comprehensive list.

Q: Can the score checking period be extended?

A: In principle, score checking stops at the end of the designated period. If there are special circumstances, please consult customer service and contact the CPHOS question-setting team promptly.
