# Supplementary material
Source: ML conference proceedings conference paper supplement (https://openreview.net/forum?id=9Wmdk94oKF)
Supplement: supplementary_material [file attachment]

Here are some off-season questions, along with their answers:

Q: When does the next exam start?

A: You can follow the latest updates on the CPHOS official public account. We will issue notifications before each exam, so you can be prepared.

Q: How can I join the CPHOS organization?

A: Thank you for your recognition of CPHOS! We welcome new members. If you are interested in joining us, you can participate in the spring, summer, and autumn recruitment. There will be information registration, interviews, and other stages. Please follow the latest updates on the CPHOS official public account.

Q: Can you send some previous exam questions?

A: You can follow the CPHOS official public account, click on "Exam Materials" below, or visit the CPHOS official website and click on "Download Resources" in the upper right corner.

Q: How do I register for the exam?

A: Before each season begins, you can register for the entire season's exam on behalf of your school. Coaches and other members of the public who wish to participate can join as observers. You can reply "Observer" in the CPHOS official public account to get the review group QR code, and you also need to contact the CPHOS management; for some outstanding students who are unable to participate in the exam on behalf of their school, CPHOS has opened a personal registration channel. Please reply "Individual Registration" in the public account to get the review group QR code, and contact the CPHOS management.

Q: When will the review of the last round of exam questions be released?

A: You can follow the latest updates on the CPHOS official public account. We will publish the exam review as soon as possible.

Q: Is the CPHOS exam free? Or is there a fee?

A: Our exams are completely free to participate in. Please follow our CPHOS official public account or visit the CPHOS official website [www.cphos.cn](http://www.cphos.cn) to view the registration-related information.
